# Supplementary material for: Multifunctional porous organic polymers embedded with magnetic nanoparticles
Source: Royal Society of Chemistry journal article supplement (doi:10.1039/c6ta09917c), 2017-01-01
Supplement: c6ta09917c1.pdf [file c6ta09917c1.pdf]

Electronic Supplementary Information

# Multifunctional Porous Organic Polymers Embedded with Magnetic Nanoparticles

Shanlin Qiao,<sup>a,b</sup> Wei Huang,<sup>c</sup> Ting Wang,<sup>c</sup> Bin Du,<sup>\*,a</sup> Xiangning Chen,<sup>a</sup>  
Abdul Hameed,<sup>d</sup> Renqiang Yang<sup>\*,c</sup>

<sup>a</sup> Beijing Key Laboratory of Agricultural Product Detection and Control of Spoilage Organisms and Pesticide Residue, Faculty of Food Science and Engineering, Beijing University of Agriculture, Beijing 102206, China.

<sup>b</sup> Institute of Chemical Industry and Pharmaceutical Engineering, Hebei University of Science and Technology, Shijiazhuang 050000, China

<sup>c</sup> CAS Key Laboratory of Bio-based Materials, Qingdao Institute of Bioenergy and Bioprocess Technology, Chinese Academy of Sciences, Qingdao 266101, China.

<sup>d</sup> CAS Key Laboratory of Standardization and Measurement for Nanotechnology, National Center for Nanoscience and Technology, Beijing 100190, China.

\* E-mail: bindu80@bua.edu.cn (B. D.), yangrq@qibebt.ac.cn (R. Y.)

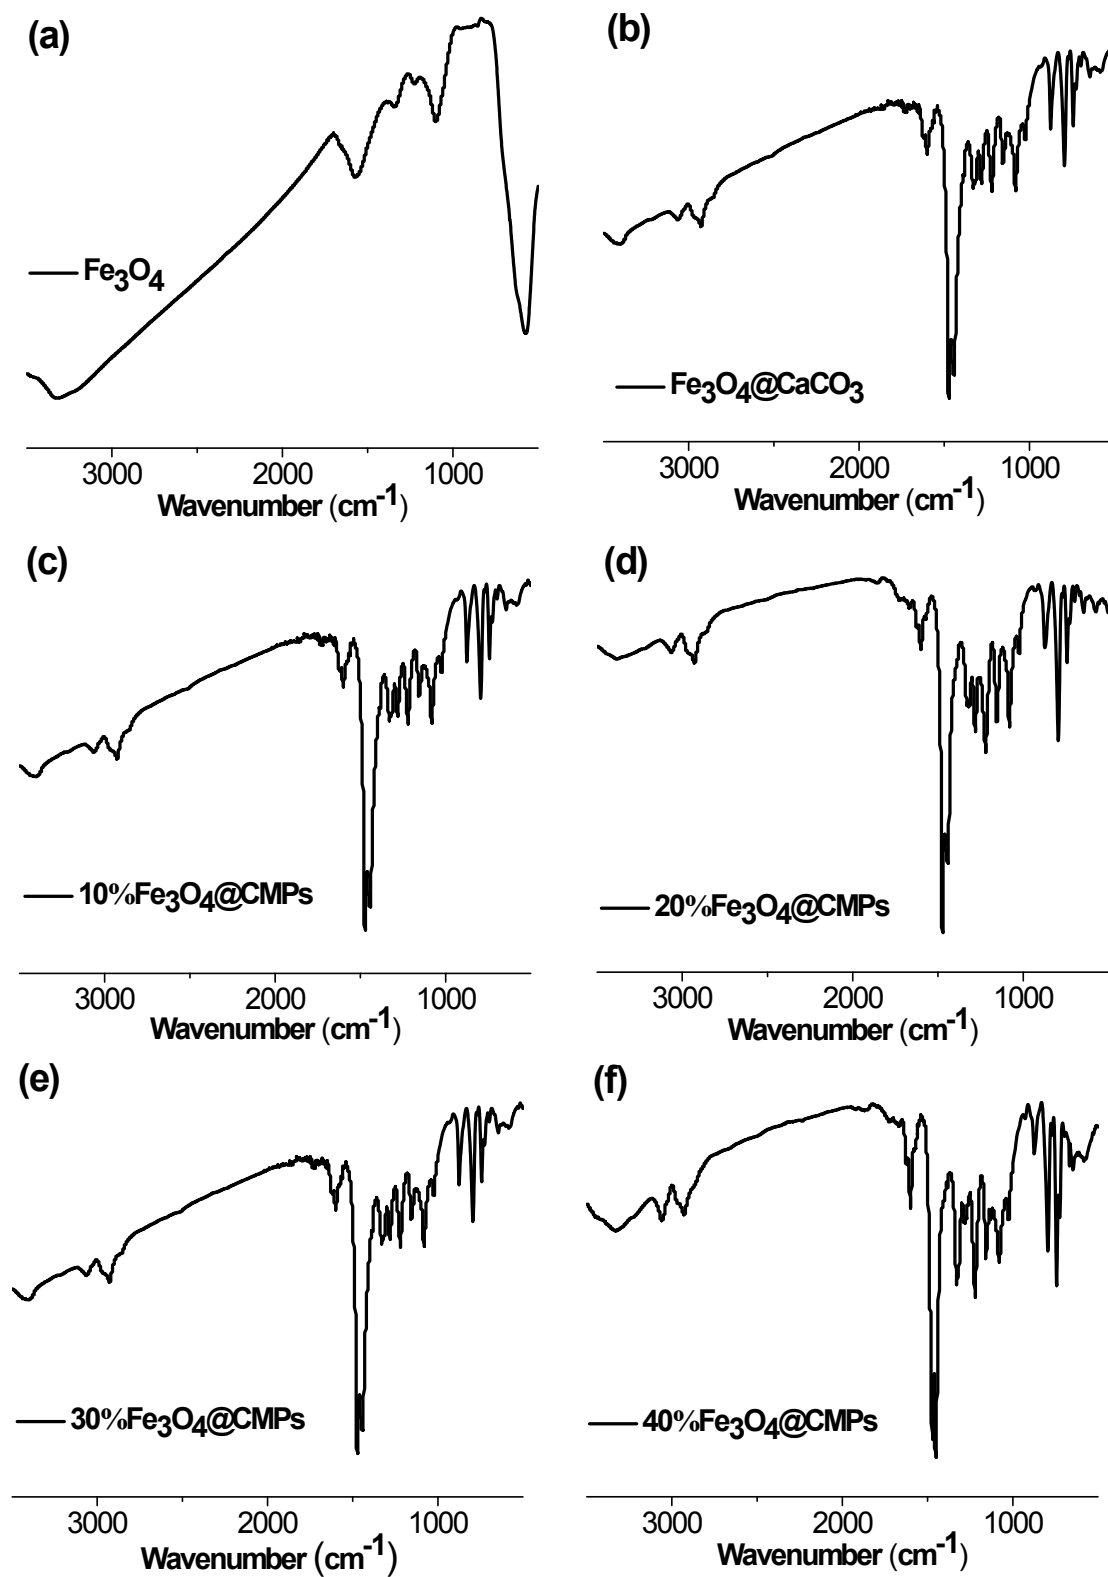

Figure S1. (a-f) FT-IR spectra of  $\text{Fe}_3\text{O}_4$  NPs,  $\text{Fe}_3\text{O}_4@CaCO_3$ , and  $\text{Fe}_3\text{O}_4@CMPs$ .

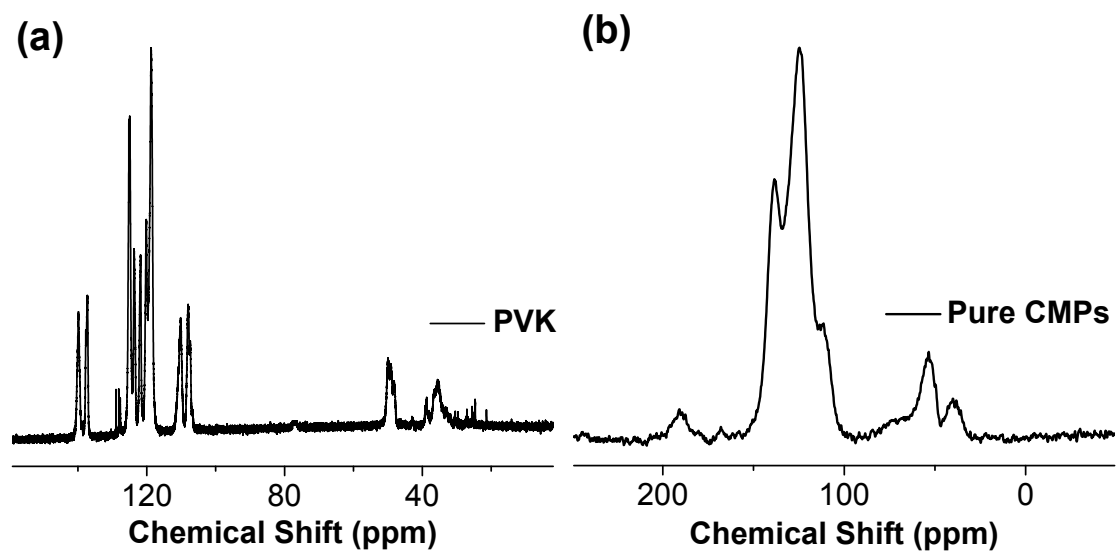

Figure S2. Solid state  $^{13}\text{C}$  CP/MAS NMR of PVK (a) and pure CMPs (b).

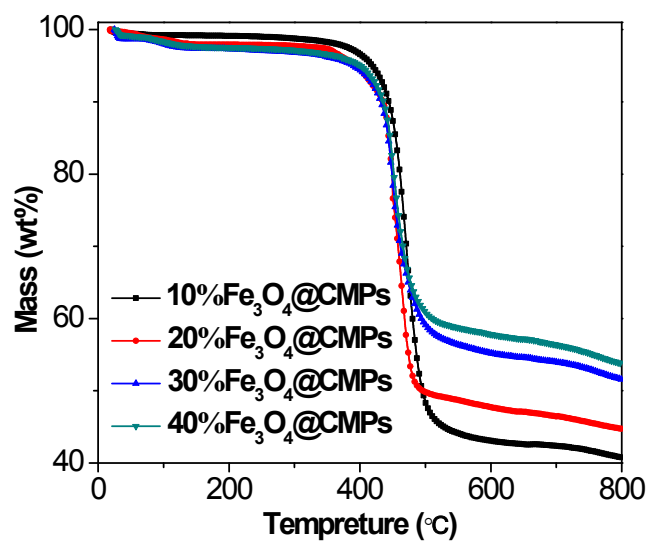

Figure S3. TGA of  $\text{Fe}_3\text{O}_4$  NPs.

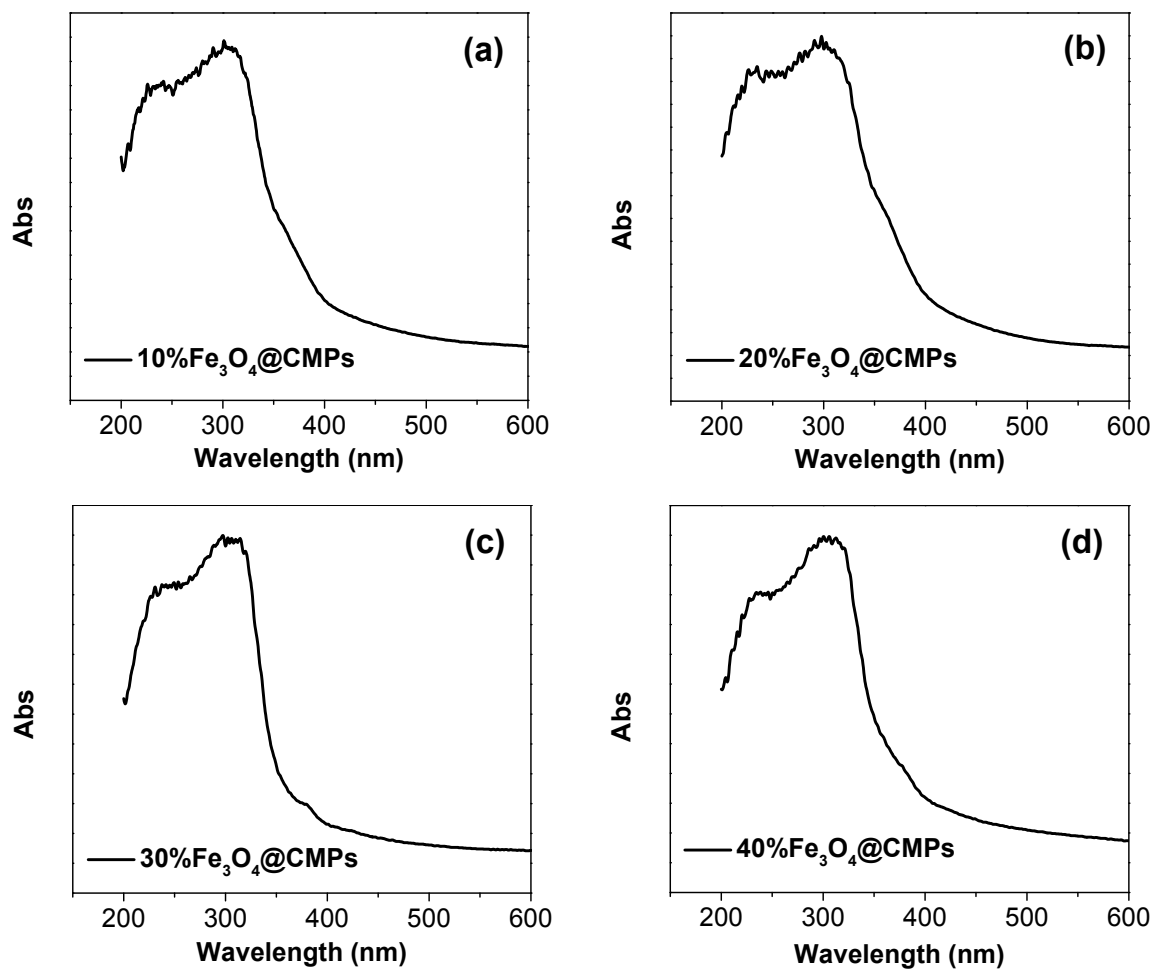

**Figure S4.** (a-d) UV-vis absorption spectra of Fe<sub>3</sub>O<sub>4</sub>@CMPs.

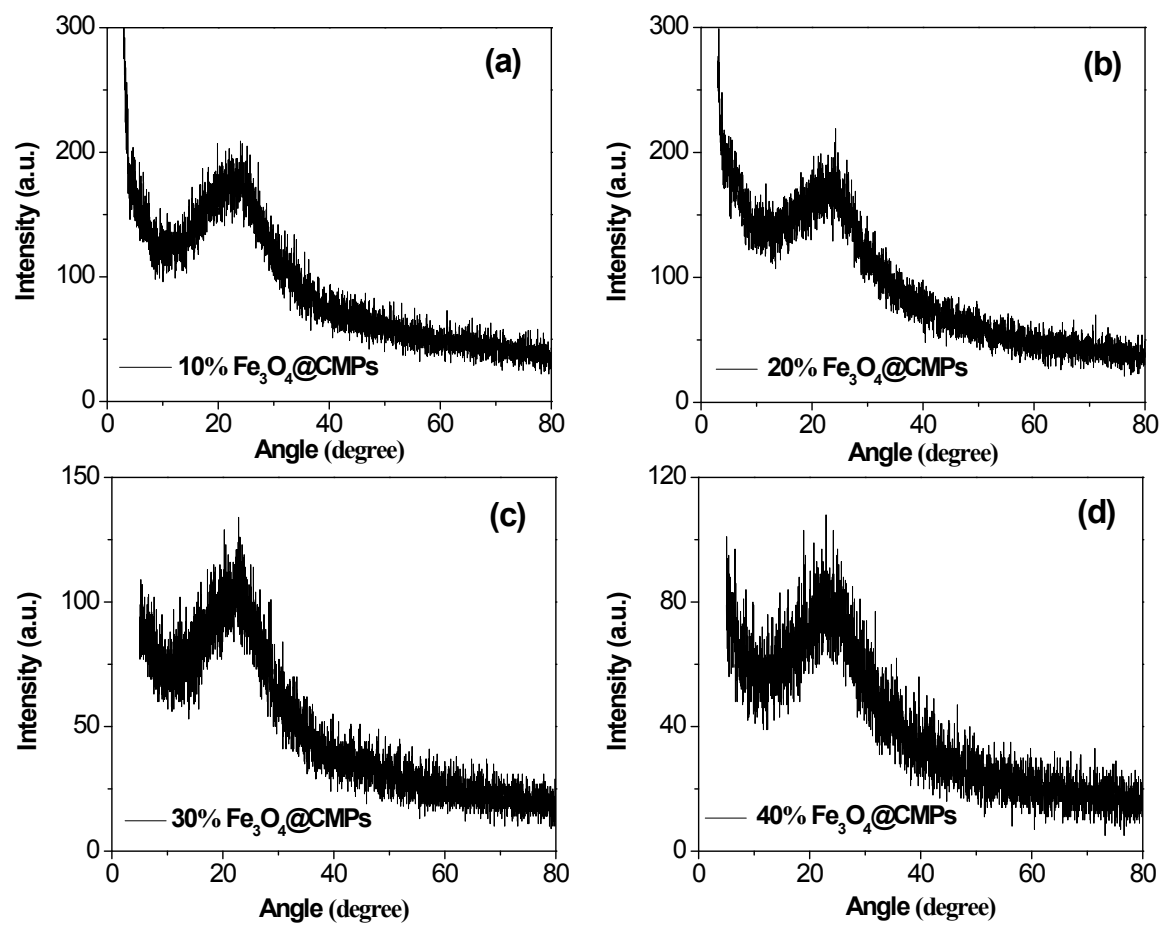

Figure S5. (a-d) Powder XRD patterns of  $\text{Fe}_3\text{O}_4$ @CMPs.

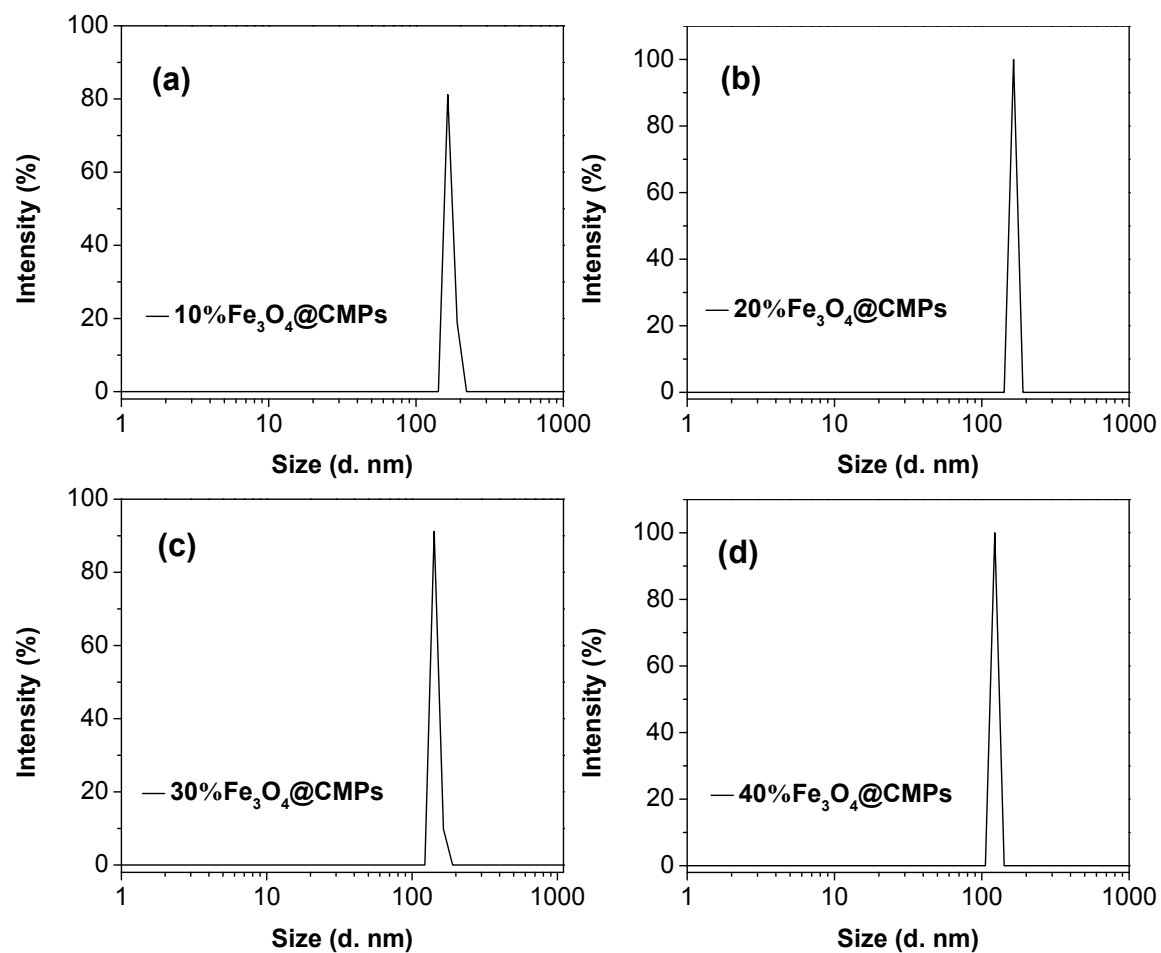

**Figure S6.** Particle size distribution of the Fe<sub>3</sub>O<sub>4</sub>@CMPs. (a) 10%Fe<sub>3</sub>O<sub>4</sub>@CMPs, (b) 20%Fe<sub>3</sub>O<sub>4</sub>@CMPs, (c) 30%Fe<sub>3</sub>O<sub>4</sub>@CMPs, and (d) 40%Fe<sub>3</sub>O<sub>4</sub>@CMPs.

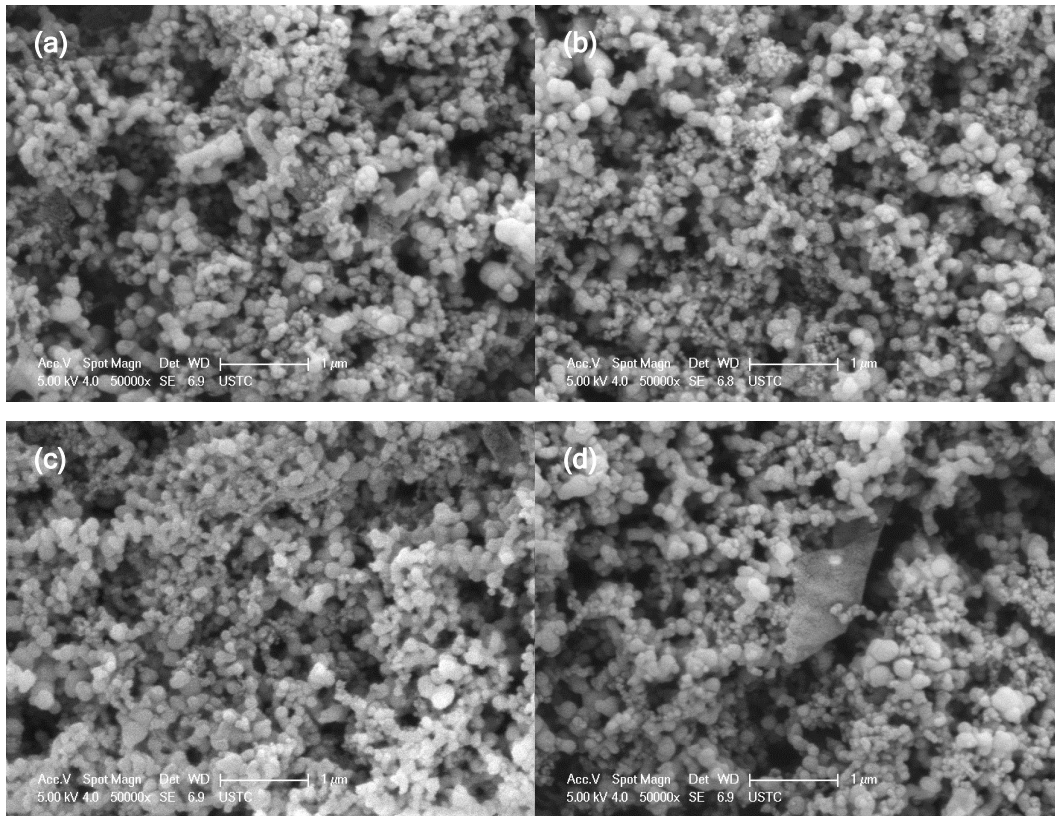

**Figure S7.** SEM images of  $\text{Fe}_3\text{O}_4@\text{CMPs}$ . (a) 10% $\text{Fe}_3\text{O}_4@\text{CMPs}$ , (b) 20% $\text{Fe}_3\text{O}_4@\text{CMPs}$ , (c) 30% $\text{Fe}_3\text{O}_4@\text{CMPs}$ , and (d) 40% $\text{Fe}_3\text{O}_4@\text{CMPs}$ .

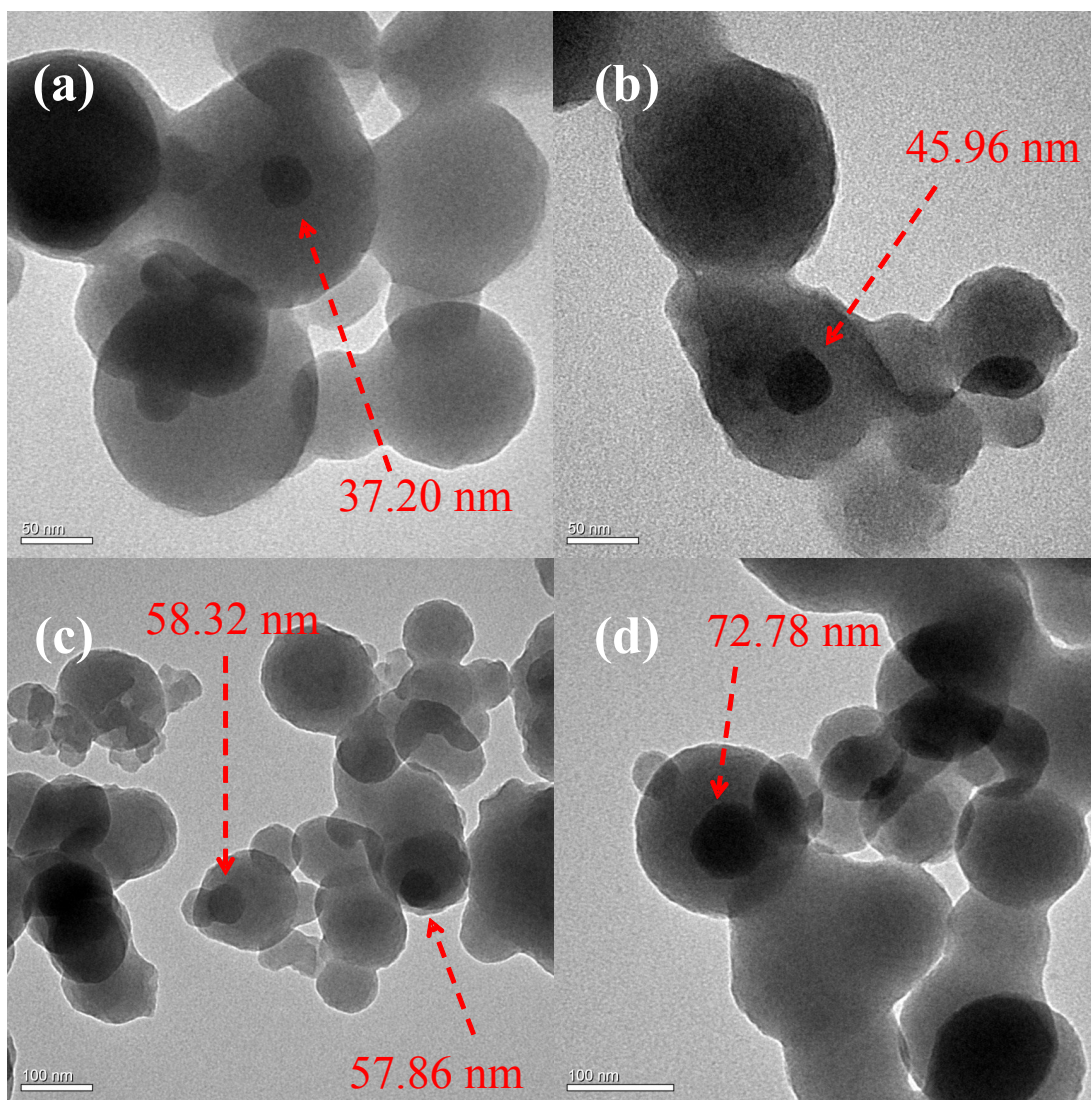

**Figure S8.** TEM images of  $\text{Fe}_3\text{O}_4$  NPs core size dimension in bulk materials. (a) 10% $\text{Fe}_3\text{O}_4$ @CMPs, (b) 20% $\text{Fe}_3\text{O}_4$ @CMPs, (c) 30% $\text{Fe}_3\text{O}_4$ @CMPs, and (d) 40%  $\text{Fe}_3\text{O}_4$ @CMPs.



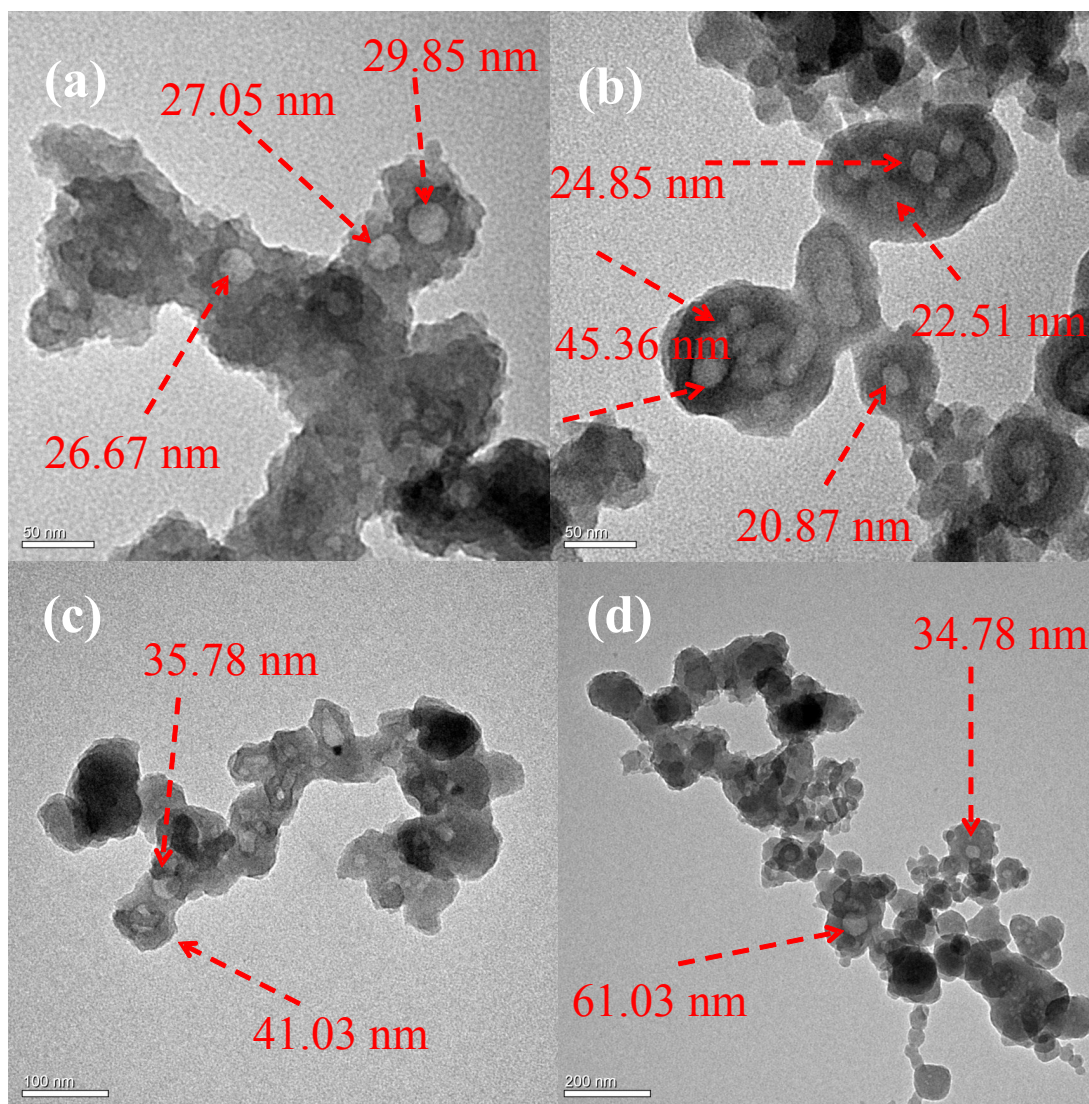

**Figure S9.** TEM images of holes dimension in bulk materials after etched by acetic acid solution. (a) 10% $\text{Fe}_3\text{O}_4$ @CMPs, (b) 20% $\text{Fe}_3\text{O}_4$ @CMPs, (c) 30% $\text{Fe}_3\text{O}_4$ @CMPs, and (d) 40% $\text{Fe}_3\text{O}_4$ @CMPs.

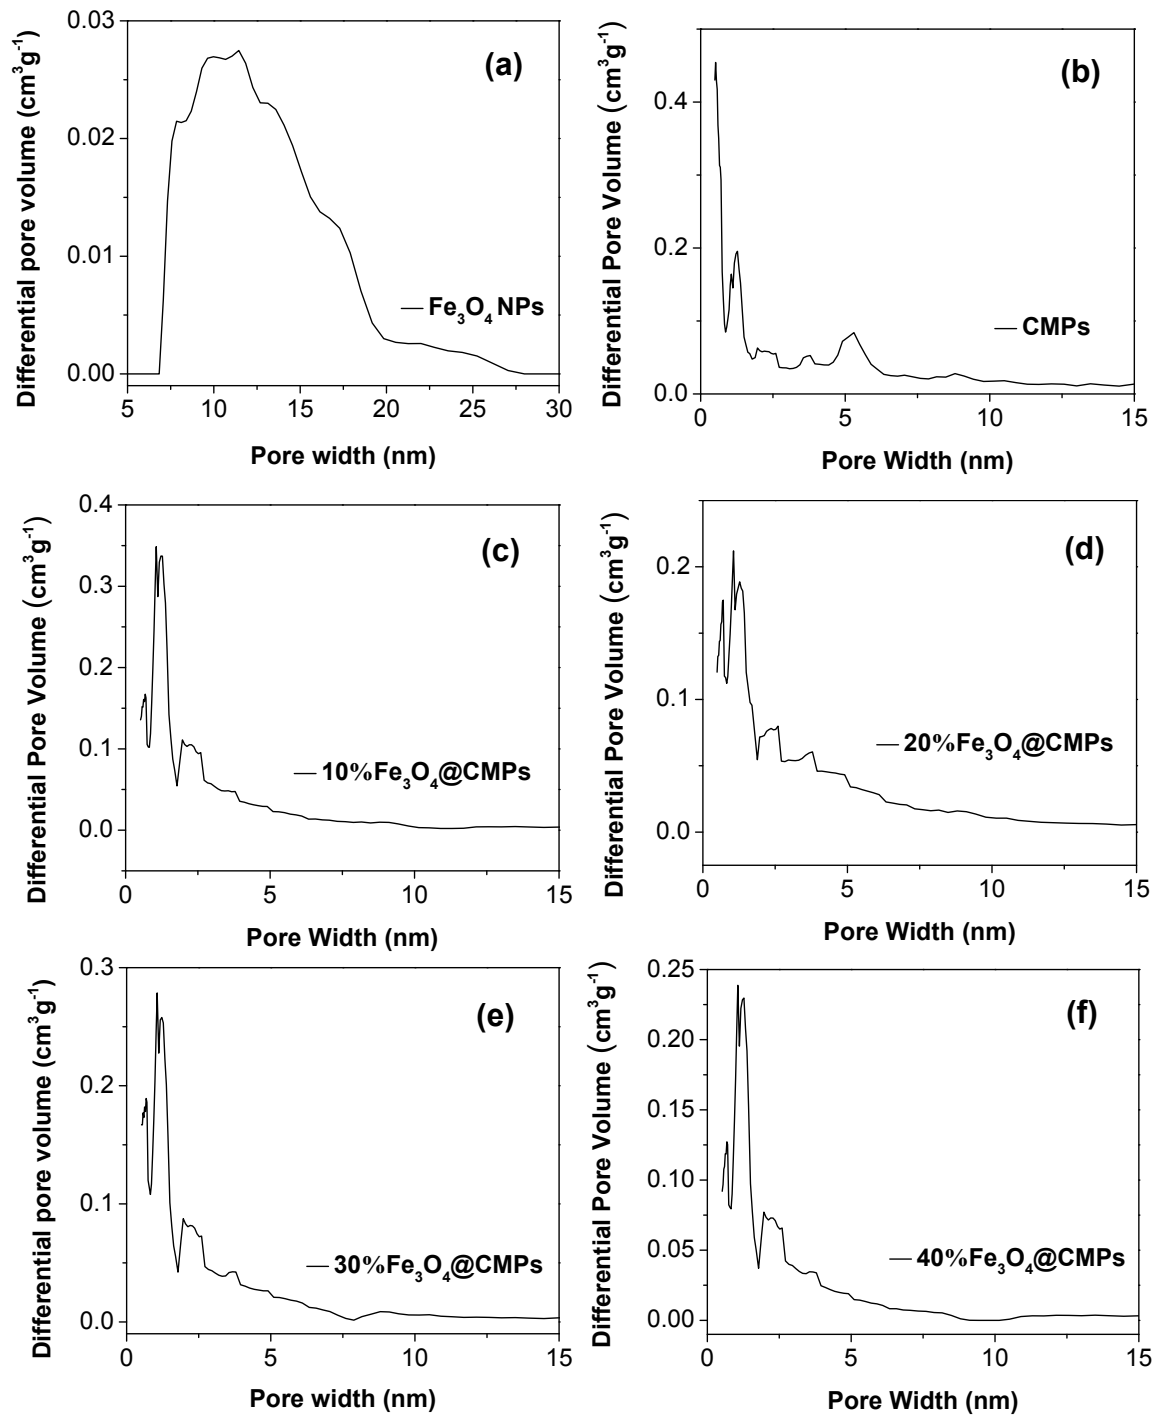

**Figure S10.** Pore size distribution calculated using nonlocal density functional theory of (a)  $\text{Fe}_3\text{O}_4$  NPs, (b) pure CMPs and (c-f) composite materials.

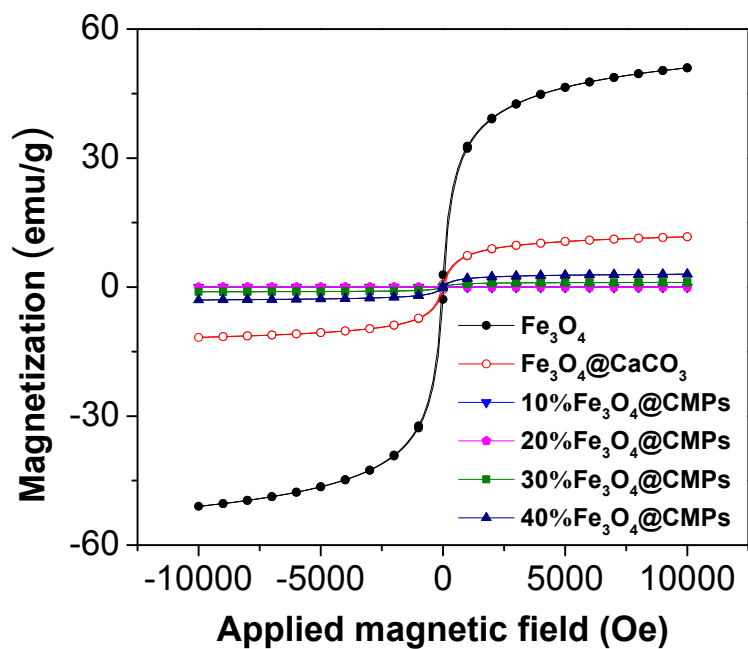

Figure S11. Hysteresis loops of  $\text{Fe}_3\text{O}_4$  NPs,  $\text{Fe}_3\text{O}_4@CaCO_3$ , and  $\text{Fe}_3\text{O}_4@CMPs$ .

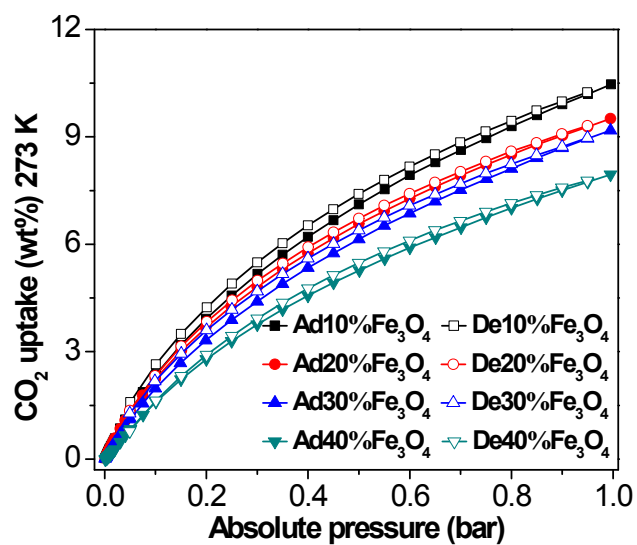

Figure S12.  $\text{CO}_2$  adsorption and desorption isotherms at 273 K.

**Table S1** Porosity properties of Fe<sub>3</sub>O<sub>4</sub>@CMPs compared with Fe<sub>3</sub>O<sub>4</sub> and pure CMPs

|                          | Fe <sub>3</sub> O <sub>4</sub> | 10% Fe <sub>3</sub> O <sub>4</sub> | 20% Fe <sub>3</sub> O <sub>4</sub> | 30% Fe <sub>3</sub> O <sub>4</sub> | 40% Fe <sub>3</sub> O <sub>4</sub> | pure CMPs |
|--------------------------|--------------------------------|------------------------------------|------------------------------------|------------------------------------|------------------------------------|-----------|
| BET <sup>a</sup>         | 102                            | 735                                | 680                                | 636                                | 518                                | 878       |
| pore volume <sup>b</sup> | 0.26                           | 1.43                               | 1.24                               | 0.95                               | 0.78                               | 1.00      |
| pore size <sup>c</sup>   | 11.44                          | 0.57                               | 0.52                               | 0.57                               | 0.59                               | 0.54      |

a Surface area calculated from N<sub>2</sub> isotherm (m<sup>2</sup> g<sup>-1</sup>).

b total pore volume at P/P<sub>0</sub> = 0.99 (cm<sup>3</sup> g<sup>-1</sup>).

c major pore size (nm).

**Table S2** Adsorbing capacity of lab solvents

| Solvent             | 10%Fe <sub>3</sub> O <sub>4</sub> | 20%Fe <sub>3</sub> O <sub>4</sub> | 30%Fe <sub>3</sub> O <sub>4</sub> | 40%Fe <sub>3</sub> O <sub>4</sub> |
|---------------------|-----------------------------------|-----------------------------------|-----------------------------------|-----------------------------------|
|                     | @CMPs (%)                         | @CMPs (%)                         | @CMPs (%)                         | @CMPs (%)                         |
| THF                 | 1167                              | 1136                              | 1050                              | 967                               |
| Ethyl acetate       | 1180                              | 1152                              | 926                               | 857                               |
| Toluene             | 1170                              | 1100                              | 1002                              | 906                               |
| Methanol            | 860                               | 834                               | 672                               | 640                               |
| Hexane              | 500                               | 447                               | 390                               | 356                               |
| Dichloromethane     | 1480                              | 1400                              | 1320                              | 1190                              |
| Chloroform          | 1600                              | 1441                              | 1364                              | 1285                              |
| Chlorobenzene       | 1298                              | 1200                              | 1120                              | 1030                              |
| 1,2-Dichlorobenzene | 1633                              | 1540                              | 1480                              | 1380                              |
